# Supplementary material for: Essential Plasticity and Redundancy of Metabolism Unveiled by Synthetic Lethality Analysis
Source: PLoS Comput Biol. 2014 May 22;10(5):e1003637. doi: 10.1371/journal.pcbi.1003637 (PMC4031049; doi:10.1371/journal.pcbi.1003637)
Supplement: Table S5 — Synthetic lethal pairs of Escherichia coli in the rich medium. They are divided into 2 categories: RSL (Redundancy Synthetic Lethal Pair), PSL (Plasticity Synthetic Lethal Pair). We show also the associated gene or genes and pathways of all reactions. (XLS) [file pcbi.1003637.s005.xls]

## Sheet: Table S5
Type	Reaction 1	Reaction 2	Genes Reaction 1	Genes Reaction 2	Pathway Reaction 1	Pathway Reaction 2		Type	Active Reaction	Non-active Reaction	Genes Active Reaction	Genes Non-active Reaction	Pathway Active Reaction	Pathway Non-active Reaction
RSL	DALAt2pp	DALAtex	b4208	(b0241 or b0929 or b1377 or b2215)	Transport, Inner Membrane	Transport, Outer Membrane Porin		PSL	GND	RPE	b2029	(b4301 or b3386)	Pentose Phosphate Pathway	Pentose Phosphate Pathway
RSL	DMPPS	IPDPS	b0029	b0029	Cofactor and Prosthetic Group Biosynthesis	Cofactor and Prosthetic Group Biosynthesis		PSL	GND	TKT2	b2029	(b2935 or b2465)	Pentose Phosphate Pathway	Pentose Phosphate Pathway
RSL	O2tex	PPPGO3	(b0241 or b0929 or b1377 or b2215)	b3850	Transport, Outer Membrane Porin	Cofactor and Prosthetic Group Biosynthesis		PSL	DUTPDP	DURIK1	(b3640 or b2251)	b1238	Nucleotide Salvage Pathway	Nucleotide Salvage Pathway
RSL	RPE	RPI	(b4301 or b3386)	(b2914 or b4090)	Pentose Phosphate Pathway	Pentose Phosphate Pathway		PSL	ACACT1r	3HAD100	(b2224 or b2342 or b3845)	(b0954 or b0180)	Membrane Lipid Metabolism	Cell Envelope Biosynthesis
RSL	RPE	TKT1	(b4301 or b3386)	(b2935 or b2465)	Pentose Phosphate Pathway	Pentose Phosphate Pathway		PSL	ACACT2r	3HAD100	(b2342 or b3845)	(b0954 or b0180)	Membrane Lipid Metabolism	Cell Envelope Biosynthesis
RSL	RPE	TKT2	(b4301 or b3386)	(b2935 or b2465)	Pentose Phosphate Pathway	Pentose Phosphate Pathway		PSL	ACACT3r	3HAD100	(b2342 or b3845)	(b0954 or b0180)	Membrane Lipid Metabolism	Cell Envelope Biosynthesis
RSL	RPI	TALA	(b2914 or b4090)	(b2464 or b0008)	Pentose Phosphate Pathway	Pentose Phosphate Pathway		PSL	ACACT4r	3HAD100	(b2342 or b3845)	(b0954 or b0180)	Membrane Lipid Metabolism	Cell Envelope Biosynthesis
RSL	RPI	TKT1	(b2914 or b4090)	(b2935 or b2465)	Pentose Phosphate Pathway	Pentose Phosphate Pathway		PSL	ACOAD1f	3HAD100	b0221	(b0954 or b0180)	Membrane Lipid Metabolism	Cell Envelope Biosynthesis
RSL	RPI	TKT2	(b2914 or b4090)	(b2935 or b2465)	Pentose Phosphate Pathway	Pentose Phosphate Pathway		PSL	ACOAD2f	3HAD100	b0221	(b0954 or b0180)	Membrane Lipid Metabolism	Cell Envelope Biosynthesis
RSL	TKT1	TKT2	(b2935 or b2465)	(b2935 or b2465)	Pentose Phosphate Pathway	Pentose Phosphate Pathway		PSL	ACOAD3f	3HAD100	b0221	(b0954 or b0180)	Membrane Lipid Metabolism	Cell Envelope Biosynthesis
								PSL	ACOAD4f	3HAD100	b0221	(b0954 or b0180)	Membrane Lipid Metabolism	Cell Envelope Biosynthesis
								PSL	ECOAH1	3HAD100	(b3846 or b2341)	(b0954 or b0180)	Membrane Lipid Metabolism	Cell Envelope Biosynthesis
								PSL	ECOAH2	3HAD100	(b3846 or b2341)	(b0954 or b0180)	Membrane Lipid Metabolism	Cell Envelope Biosynthesis
								PSL	ECOAH3	3HAD100	(b3846 or b2341)	(b0954 or b0180)	Membrane Lipid Metabolism	Cell Envelope Biosynthesis
								PSL	ECOAH4	3HAD100	(b3846 or b2341)	(b0954 or b0180)	Membrane Lipid Metabolism	Cell Envelope Biosynthesis
								PSL	HACD1	3HAD100	(b3846 or b2341)	(b0954 or b0180)	Membrane Lipid Metabolism	Cell Envelope Biosynthesis
								PSL	HACD2	3HAD100	(b3846 or b2341)	(b0954 or b0180)	Membrane Lipid Metabolism	Cell Envelope Biosynthesis
								PSL	HACD3	3HAD100	(b3846 or b2341)	(b0954 or b0180)	Membrane Lipid Metabolism	Cell Envelope Biosynthesis
								PSL	HACD4	3HAD100	(b3846 or b2341)	(b0954 or b0180)	Membrane Lipid Metabolism	Cell Envelope Biosynthesis
								PSL	AACPS7	3HAD120	(b2836 and b1094)	(b0180 or b0954)	Cell Envelope Biosynthesis	Cell Envelope Biosynthesis
								PSL	FACOAE120	3HAD120	b0452	(b0180 or b0954)	Cell Envelope Biosynthesis	Cell Envelope Biosynthesis
								PSL	AACPS3	3HAD160	(b2836 and b1094)	(b0954 or b0180)	Cell Envelope Biosynthesis	Cell Envelope Biosynthesis
								PSL	FACOAE160	3HAD160	b0452	(b0954 or b0180)	Cell Envelope Biosynthesis	Cell Envelope Biosynthesis
								PSL	AACPS4	3HAD161	(b2836 and b1094)	(b0180 or b0954)	Cell Envelope Biosynthesis	Cell Envelope Biosynthesis
								PSL	CTECOAI7	3HAD161	b3846	(b0180 or b0954)	Membrane Lipid Metabolism	Cell Envelope Biosynthesis
								PSL	FACOAE161	3HAD161	b0452	(b0180 or b0954)	Cell Envelope Biosynthesis	Cell Envelope Biosynthesis
								PSL	ACACT1r	3HAD40	(b2224 or b2342 or b3845)	(b0954 or b0180)	Membrane Lipid Metabolism	Cell Envelope Biosynthesis
								PSL	ACACT2r	3HAD40	(b2342 or b3845)	(b0954 or b0180)	Membrane Lipid Metabolism	Cell Envelope Biosynthesis
								PSL	ACACT3r	3HAD40	(b2342 or b3845)	(b0954 or b0180)	Membrane Lipid Metabolism	Cell Envelope Biosynthesis
								PSL	ACOAD1f	3HAD40	b0221	(b0954 or b0180)	Membrane Lipid Metabolism	Cell Envelope Biosynthesis
								PSL	ACOAD2f	3HAD40	b0221	(b0954 or b0180)	Membrane Lipid Metabolism	Cell Envelope Biosynthesis
								PSL	ACOAD3f	3HAD40	b0221	(b0954 or b0180)	Membrane Lipid Metabolism	Cell Envelope Biosynthesis
								PSL	ECOAH1	3HAD40	(b3846 or b2341)	(b0954 or b0180)	Membrane Lipid Metabolism	Cell Envelope Biosynthesis
								PSL	ECOAH2	3HAD40	(b3846 or b2341)	(b0954 or b0180)	Membrane Lipid Metabolism	Cell Envelope Biosynthesis
								PSL	ECOAH3	3HAD40	(b3846 or b2341)	(b0954 or b0180)	Membrane Lipid Metabolism	Cell Envelope Biosynthesis
								PSL	HACD1	3HAD40	(b3846 or b2341)	(b0954 or b0180)	Membrane Lipid Metabolism	Cell Envelope Biosynthesis
								PSL	HACD2	3HAD40	(b3846 or b2341)	(b0954 or b0180)	Membrane Lipid Metabolism	Cell Envelope Biosynthesis
								PSL	HACD3	3HAD40	(b3846 or b2341)	(b0954 or b0180)	Membrane Lipid Metabolism	Cell Envelope Biosynthesis
								PSL	ACACT1r	3HAD60	(b2224 or b2342 or b3845)	(b0954 or b0180)	Membrane Lipid Metabolism	Cell Envelope Biosynthesis
								PSL	ACACT2r	3HAD60	(b2342 or b3845)	(b0954 or b0180)	Membrane Lipid Metabolism	Cell Envelope Biosynthesis
								PSL	ACACT3r	3HAD60	(b2342 or b3845)	(b0954 or b0180)	Membrane Lipid Metabolism	Cell Envelope Biosynthesis
								PSL	ACOAD1f	3HAD60	b0221	(b0954 or b0180)	Membrane Lipid Metabolism	Cell Envelope Biosynthesis
								PSL	ACOAD2f	3HAD60	b0221	(b0954 or b0180)	Membrane Lipid Metabolism	Cell Envelope Biosynthesis
								PSL	ACOAD3f	3HAD60	b0221	(b0954 or b0180)	Membrane Lipid Metabolism	Cell Envelope Biosynthesis
								PSL	ECOAH1	3HAD60	(b3846 or b2341)	(b0954 or b0180)	Membrane Lipid Metabolism	Cell Envelope Biosynthesis
								PSL	ECOAH2	3HAD60	(b3846 or b2341)	(b0954 or b0180)	Membrane Lipid Metabolism	Cell Envelope Biosynthesis
								PSL	ECOAH3	3HAD60	(b3846 or b2341)	(b0954 or b0180)	Membrane Lipid Metabolism	Cell Envelope Biosynthesis
								PSL	HACD1	3HAD60	(b3846 or b2341)	(b0954 or b0180)	Membrane Lipid Metabolism	Cell Envelope Biosynthesis
								PSL	HACD2	3HAD60	(b3846 or b2341)	(b0954 or b0180)	Membrane Lipid Metabolism	Cell Envelope Biosynthesis
								PSL	HACD3	3HAD60	(b3846 or b2341)	(b0954 or b0180)	Membrane Lipid Metabolism	Cell Envelope Biosynthesis
								PSL	ACACT1r	3HAD80	(b2224 or b2342 or b3845)	(b0954 or b0180)	Membrane Lipid Metabolism	Cell Envelope Biosynthesis
								PSL	ACACT2r	3HAD80	(b2342 or b3845)	(b0954 or b0180)	Membrane Lipid Metabolism	Cell Envelope Biosynthesis
								PSL	ACACT3r	3HAD80	(b2342 or b3845)	(b0954 or b0180)	Membrane Lipid Metabolism	Cell Envelope Biosynthesis
								PSL	ACOAD1f	3HAD80	b0221	(b0954 or b0180)	Membrane Lipid Metabolism	Cell Envelope Biosynthesis
								PSL	ACOAD2f	3HAD80	b0221	(b0954 or b0180)	Membrane Lipid Metabolism	Cell Envelope Biosynthesis
								PSL	ACOAD3f	3HAD80	b0221	(b0954 or b0180)	Membrane Lipid Metabolism	Cell Envelope Biosynthesis
								PSL	ECOAH1	3HAD80	(b3846 or b2341)	(b0954 or b0180)	Membrane Lipid Metabolism	Cell Envelope Biosynthesis
								PSL	ECOAH2	3HAD80	(b3846 or b2341)	(b0954 or b0180)	Membrane Lipid Metabolism	Cell Envelope Biosynthesis
								PSL	ECOAH3	3HAD80	(b3846 or b2341)	(b0954 or b0180)	Membrane Lipid Metabolism	Cell Envelope Biosynthesis
								PSL	HACD1	3HAD80	(b3846 or b2341)	(b0954 or b0180)	Membrane Lipid Metabolism	Cell Envelope Biosynthesis
								PSL	HACD2	3HAD80	(b3846 or b2341)	(b0954 or b0180)	Membrane Lipid Metabolism	Cell Envelope Biosynthesis
								PSL	HACD3	3HAD80	(b3846 or b2341)	(b0954 or b0180)	Membrane Lipid Metabolism	Cell Envelope Biosynthesis
								PSL	ACACT1r	3OAR100	(b2224 or b2342 or b3845)	b1093	Membrane Lipid Metabolism	Cell Envelope Biosynthesis
								PSL	ACACT2r	3OAR100	(b2342 or b3845)	b1093	Membrane Lipid Metabolism	Cell Envelope Biosynthesis
								PSL	ACACT3r	3OAR100	(b2342 or b3845)	b1093	Membrane Lipid Metabolism	Cell Envelope Biosynthesis
								PSL	ACACT4r	3OAR100	(b2342 or b3845)	b1093	Membrane Lipid Metabolism	Cell Envelope Biosynthesis
								PSL	ACOAD1f	3OAR100	b0221	b1093	Membrane Lipid Metabolism	Cell Envelope Biosynthesis
								PSL	ACOAD2f	3OAR100	b0221	b1093	Membrane Lipid Metabolism	Cell Envelope Biosynthesis
								PSL	ACOAD3f	3OAR100	b0221	b1093	Membrane Lipid Metabolism	Cell Envelope Biosynthesis
								PSL	ACOAD4f	3OAR100	b0221	b1093	Membrane Lipid Metabolism	Cell Envelope Biosynthesis
								PSL	ECOAH1	3OAR100	(b3846 or b2341)	b1093	Membrane Lipid Metabolism	Cell Envelope Biosynthesis
								PSL	ECOAH2	3OAR100	(b3846 or b2341)	b1093	Membrane Lipid Metabolism	Cell Envelope Biosynthesis
								PSL	ECOAH3	3OAR100	(b3846 or b2341)	b1093	Membrane Lipid Metabolism	Cell Envelope Biosynthesis
								PSL	ECOAH4	3OAR100	(b3846 or b2341)	b1093	Membrane Lipid Metabolism	Cell Envelope Biosynthesis
								PSL	HACD1	3OAR100	(b3846 or b2341)	b1093	Membrane Lipid Metabolism	Cell Envelope Biosynthesis
								PSL	HACD2	3OAR100	(b3846 or b2341)	b1093	Membrane Lipid Metabolism	Cell Envelope Biosynthesis
								PSL	HACD3	3OAR100	(b3846 or b2341)	b1093	Membrane Lipid Metabolism	Cell Envelope Biosynthesis
								PSL	HACD4	3OAR100	(b3846 or b2341)	b1093	Membrane Lipid Metabolism	Cell Envelope Biosynthesis
								PSL	AACPS7	3OAR120	(b2836 and b1094)	b1093	Cell Envelope Biosynthesis	Cell Envelope Biosynthesis
								PSL	FACOAE120	3OAR120	b0452	b1093	Cell Envelope Biosynthesis	Cell Envelope Biosynthesis
								PSL	AACPS3	3OAR160	(b2836 and b1094)	b1093	Cell Envelope Biosynthesis	Cell Envelope Biosynthesis
								PSL	FACOAE160	3OAR160	b0452	b1093	Cell Envelope Biosynthesis	Cell Envelope Biosynthesis
								PSL	AACPS4	3OAR161	(b2836 and b1094)	b1093	Cell Envelope Biosynthesis	Cell Envelope Biosynthesis
								PSL	CTECOAI7	3OAR161	b3846	b1093	Membrane Lipid Metabolism	Cell Envelope Biosynthesis
								PSL	FACOAE161	3OAR161	b0452	b1093	Cell Envelope Biosynthesis	Cell Envelope Biosynthesis
								PSL	ACACT1r	3OAR40	(b2224 or b2342 or b3845)	b1093	Membrane Lipid Metabolism	Cell Envelope Biosynthesis
								PSL	ACACT2r	3OAR40	(b2342 or b3845)	b1093	Membrane Lipid Metabolism	Cell Envelope Biosynthesis
								PSL	ACACT3r	3OAR40	(b2342 or b3845)	b1093	Membrane Lipid Metabolism	Cell Envelope Biosynthesis
								PSL	ACOAD1f	3OAR40	b0221	b1093	Membrane Lipid Metabolism	Cell Envelope Biosynthesis
								PSL	ACOAD2f	3OAR40	b0221	b1093	Membrane Lipid Metabolism	Cell Envelope Biosynthesis
								PSL	ACOAD3f	3OAR40	b0221	b1093	Membrane Lipid Metabolism	Cell Envelope Biosynthesis
								PSL	ECOAH1	3OAR40	(b3846 or b2341)	b1093	Membrane Lipid Metabolism	Cell Envelope Biosynthesis
								PSL	ECOAH2	3OAR40	(b3846 or b2341)	b1093	Membrane Lipid Metabolism	Cell Envelope Biosynthesis
								PSL	ECOAH3	3OAR40	(b3846 or b2341)	b1093	Membrane Lipid Metabolism	Cell Envelope Biosynthesis
								PSL	HACD1	3OAR40	(b3846 or b2341)	b1093	Membrane Lipid Metabolism	Cell Envelope Biosynthesis
								PSL	HACD2	3OAR40	(b3846 or b2341)	b1093	Membrane Lipid Metabolism	Cell Envelope Biosynthesis
								PSL	HACD3	3OAR40	(b3846 or b2341)	b1093	Membrane Lipid Metabolism	Cell Envelope Biosynthesis
								PSL	ACACT1r	3OAR60	(b2224 or b2342 or b3845)	b1093	Membrane Lipid Metabolism	Cell Envelope Biosynthesis
								PSL	ACACT2r	3OAR60	(b2342 or b3845)	b1093	Membrane Lipid Metabolism	Cell Envelope Biosynthesis
								PSL	ACACT3r	3OAR60	(b2342 or b3845)	b1093	Membrane Lipid Metabolism	Cell Envelope Biosynthesis
								PSL	ACOAD1f	3OAR60	b0221	b1093	Membrane Lipid Metabolism	Cell Envelope Biosynthesis
								PSL	ACOAD2f	3OAR60	b0221	b1093	Membrane Lipid Metabolism	Cell Envelope Biosynthesis
								PSL	ACOAD3f	3OAR60	b0221	b1093	Membrane Lipid Metabolism	Cell Envelope Biosynthesis
								PSL	ECOAH1	3OAR60	(b3846 or b2341)	b1093	Membrane Lipid Metabolism	Cell Envelope Biosynthesis
								PSL	ECOAH2	3OAR60	(b3846 or b2341)	b1093	Membrane Lipid Metabolism	Cell Envelope Biosynthesis
								PSL	ECOAH3	3OAR60	(b3846 or b2341)	b1093	Membrane Lipid Metabolism	Cell Envelope Biosynthesis
								PSL	HACD1	3OAR60	(b3846 or b2341)	b1093	Membrane Lipid Metabolism	Cell Envelope Biosynthesis
								PSL	HACD2	3OAR60	(b3846 or b2341)	b1093	Membrane Lipid Metabolism	Cell Envelope Biosynthesis
								PSL	HACD3	3OAR60	(b3846 or b2341)	b1093	Membrane Lipid Metabolism	Cell Envelope Biosynthesis
								PSL	ACACT1r	3OAR80	(b2224 or b2342 or b3845)	b1093	Membrane Lipid Metabolism	Cell Envelope Biosynthesis
								PSL	ACACT2r	3OAR80	(b2342 or b3845)	b1093	Membrane Lipid Metabolism	Cell Envelope Biosynthesis
								PSL	ACACT3r	3OAR80	(b2342 or b3845)	b1093	Membrane Lipid Metabolism	Cell Envelope Biosynthesis
								PSL	ACOAD1f	3OAR80	b0221	b1093	Membrane Lipid Metabolism	Cell Envelope Biosynthesis
								PSL	ACOAD2f	3OAR80	b0221	b1093	Membrane Lipid Metabolism	Cell Envelope Biosynthesis
								PSL	ACOAD3f	3OAR80	b0221	b1093	Membrane Lipid Metabolism	Cell Envelope Biosynthesis
								PSL	ECOAH1	3OAR80	(b3846 or b2341)	b1093	Membrane Lipid Metabolism	Cell Envelope Biosynthesis
								PSL	ECOAH2	3OAR80	(b3846 or b2341)	b1093	Membrane Lipid Metabolism	Cell Envelope Biosynthesis
								PSL	ECOAH3	3OAR80	(b3846 or b2341)	b1093	Membrane Lipid Metabolism	Cell Envelope Biosynthesis
								PSL	HACD1	3OAR80	(b3846 or b2341)	b1093	Membrane Lipid Metabolism	Cell Envelope Biosynthesis
								PSL	HACD2	3OAR80	(b3846 or b2341)	b1093	Membrane Lipid Metabolism	Cell Envelope Biosynthesis
								PSL	HACD3	3OAR80	(b3846 or b2341)	b1093	Membrane Lipid Metabolism	Cell Envelope Biosynthesis
								PSL	ACACT1r	3OAS100	(b2224 or b2342 or b3845)	(b2323 or b1095)	Membrane Lipid Metabolism	Cell Envelope Biosynthesis
								PSL	ACACT2r	3OAS100	(b2342 or b3845)	(b2323 or b1095)	Membrane Lipid Metabolism	Cell Envelope Biosynthesis
								PSL	ACACT3r	3OAS100	(b2342 or b3845)	(b2323 or b1095)	Membrane Lipid Metabolism	Cell Envelope Biosynthesis
								PSL	ACACT4r	3OAS100	(b2342 or b3845)	(b2323 or b1095)	Membrane Lipid Metabolism	Cell Envelope Biosynthesis
								PSL	ACOAD1f	3OAS100	b0221	(b2323 or b1095)	Membrane Lipid Metabolism	Cell Envelope Biosynthesis
								PSL	ACOAD2f	3OAS100	b0221	(b2323 or b1095)	Membrane Lipid Metabolism	Cell Envelope Biosynthesis
								PSL	ACOAD3f	3OAS100	b0221	(b2323 or b1095)	Membrane Lipid Metabolism	Cell Envelope Biosynthesis
								PSL	ACOAD4f	3OAS100	b0221	(b2323 or b1095)	Membrane Lipid Metabolism	Cell Envelope Biosynthesis
								PSL	ECOAH1	3OAS100	(b3846 or b2341)	(b2323 or b1095)	Membrane Lipid Metabolism	Cell Envelope Biosynthesis
								PSL	ECOAH2	3OAS100	(b3846 or b2341)	(b2323 or b1095)	Membrane Lipid Metabolism	Cell Envelope Biosynthesis
								PSL	ECOAH3	3OAS100	(b3846 or b2341)	(b2323 or b1095)	Membrane Lipid Metabolism	Cell Envelope Biosynthesis
								PSL	ECOAH4	3OAS100	(b3846 or b2341)	(b2323 or b1095)	Membrane Lipid Metabolism	Cell Envelope Biosynthesis
								PSL	HACD1	3OAS100	(b3846 or b2341)	(b2323 or b1095)	Membrane Lipid Metabolism	Cell Envelope Biosynthesis
								PSL	HACD2	3OAS100	(b3846 or b2341)	(b2323 or b1095)	Membrane Lipid Metabolism	Cell Envelope Biosynthesis
								PSL	HACD3	3OAS100	(b3846 or b2341)	(b2323 or b1095)	Membrane Lipid Metabolism	Cell Envelope Biosynthesis
								PSL	HACD4	3OAS100	(b3846 or b2341)	(b2323 or b1095)	Membrane Lipid Metabolism	Cell Envelope Biosynthesis
								PSL	AACPS7	3OAS120	(b2836 and b1094)	(b1095 or b2323)	Cell Envelope Biosynthesis	Cell Envelope Biosynthesis
								PSL	FACOAE120	3OAS120	b0452	(b1095 or b2323)	Cell Envelope Biosynthesis	Cell Envelope Biosynthesis
								PSL	AACPS3	3OAS160	(b2836 and b1094)	(b2323 or b1095)	Cell Envelope Biosynthesis	Cell Envelope Biosynthesis
								PSL	FACOAE160	3OAS160	b0452	(b2323 or b1095)	Cell Envelope Biosynthesis	Cell Envelope Biosynthesis
								PSL	AACPS4	3OAS161	(b2836 and b1094)	b2323	Cell Envelope Biosynthesis	Cell Envelope Biosynthesis
								PSL	CTECOAI7	3OAS161	b3846	b2323	Membrane Lipid Metabolism	Cell Envelope Biosynthesis
								PSL	FACOAE161	3OAS161	b0452	b2323	Cell Envelope Biosynthesis	Cell Envelope Biosynthesis
								PSL	ACACT1r	3OAS60	(b2224 or b2342 or b3845)	(b1095 or b2323)	Membrane Lipid Metabolism	Cell Envelope Biosynthesis
								PSL	ACACT2r	3OAS60	(b2342 or b3845)	(b1095 or b2323)	Membrane Lipid Metabolism	Cell Envelope Biosynthesis
								PSL	ACACT3r	3OAS60	(b2342 or b3845)	(b1095 or b2323)	Membrane Lipid Metabolism	Cell Envelope Biosynthesis
								PSL	ACOAD1f	3OAS60	b0221	(b1095 or b2323)	Membrane Lipid Metabolism	Cell Envelope Biosynthesis
								PSL	ACOAD2f	3OAS60	b0221	(b1095 or b2323)	Membrane Lipid Metabolism	Cell Envelope Biosynthesis
								PSL	ACOAD3f	3OAS60	b0221	(b1095 or b2323)	Membrane Lipid Metabolism	Cell Envelope Biosynthesis
								PSL	ECOAH1	3OAS60	(b3846 or b2341)	(b1095 or b2323)	Membrane Lipid Metabolism	Cell Envelope Biosynthesis
								PSL	ECOAH2	3OAS60	(b3846 or b2341)	(b1095 or b2323)	Membrane Lipid Metabolism	Cell Envelope Biosynthesis
								PSL	ECOAH3	3OAS60	(b3846 or b2341)	(b1095 or b2323)	Membrane Lipid Metabolism	Cell Envelope Biosynthesis
								PSL	HACD1	3OAS60	(b3846 or b2341)	(b1095 or b2323)	Membrane Lipid Metabolism	Cell Envelope Biosynthesis
								PSL	HACD2	3OAS60	(b3846 or b2341)	(b1095 or b2323)	Membrane Lipid Metabolism	Cell Envelope Biosynthesis
								PSL	HACD3	3OAS60	(b3846 or b2341)	(b1095 or b2323)	Membrane Lipid Metabolism	Cell Envelope Biosynthesis
								PSL	ACACT1r	3OAS80	(b2224 or b2342 or b3845)	(b2323 or b1095)	Membrane Lipid Metabolism	Cell Envelope Biosynthesis
								PSL	ACACT2r	3OAS80	(b2342 or b3845)	(b2323 or b1095)	Membrane Lipid Metabolism	Cell Envelope Biosynthesis
								PSL	ACACT3r	3OAS80	(b2342 or b3845)	(b2323 or b1095)	Membrane Lipid Metabolism	Cell Envelope Biosynthesis
								PSL	ACOAD1f	3OAS80	b0221	(b2323 or b1095)	Membrane Lipid Metabolism	Cell Envelope Biosynthesis
								PSL	ACOAD2f	3OAS80	b0221	(b2323 or b1095)	Membrane Lipid Metabolism	Cell Envelope Biosynthesis
								PSL	ACOAD3f	3OAS80	b0221	(b2323 or b1095)	Membrane Lipid Metabolism	Cell Envelope Biosynthesis
								PSL	ECOAH1	3OAS80	(b3846 or b2341)	(b2323 or b1095)	Membrane Lipid Metabolism	Cell Envelope Biosynthesis
								PSL	ECOAH2	3OAS80	(b3846 or b2341)	(b2323 or b1095)	Membrane Lipid Metabolism	Cell Envelope Biosynthesis
								PSL	ECOAH3	3OAS80	(b3846 or b2341)	(b2323 or b1095)	Membrane Lipid Metabolism	Cell Envelope Biosynthesis
								PSL	HACD1	3OAS80	(b3846 or b2341)	(b2323 or b1095)	Membrane Lipid Metabolism	Cell Envelope Biosynthesis
								PSL	HACD2	3OAS80	(b3846 or b2341)	(b2323 or b1095)	Membrane Lipid Metabolism	Cell Envelope Biosynthesis
								PSL	HACD3	3OAS80	(b3846 or b2341)	(b2323 or b1095)	Membrane Lipid Metabolism	Cell Envelope Biosynthesis
								PSL	G3PAT160	ACPPAT160	(b1094 and b4041)	(b1094 and b1090)	Glycerophospholipid Metabolism	Glycerophospholipid Metabolism
								PSL	G3PAT161	ACPPAT161	(b1094 and b4041)	(b1094 and b1090)	Glycerophospholipid Metabolism	Glycerophospholipid Metabolism
								PSL	ADK3	NDPK1	b0474	(b0474 or b2518)	Nucleotide Salvage Pathway	Nucleotide Salvage Pathway
								PSL	G3PAT160	APG3PAT160	(b1094 and b4041)	b3059	Glycerophospholipid Metabolism	Glycerophospholipid Metabolism
								PSL	G3PAT161	APG3PAT161	(b1094 and b4041)	b3059	Glycerophospholipid Metabolism	Glycerophospholipid Metabolism
								PSL	CPPPGO	CPPPGO2	b2436	b3867	Cofactor and Prosthetic Group Biosynthesis	Cofactor and Prosthetic Group Biosynthesis
								PSL	O2tex	CPPPGO2	(b0241 or b0929 or b1377 or b2215)	b3867	Transport, Outer Membrane Porin	Cofactor and Prosthetic Group Biosynthesis
								PSL	DMPPS	IPDDI	b0029	b2889	Cofactor and Prosthetic Group Biosynthesis	Cofactor and Prosthetic Group Biosynthesis
								PSL	POR5	FLDR2	((b0684 and b1378) or (b2895 and b1378))	((b0684 and b3924) or (b2895 and b3924))	Pyruvate Metabolism	Unassigned
								PSL	I2FE2SS	S2FE2SS	(b3807 and b2530 and b2529)	(b3807 and b1683 and b1682 and b1681 and b1679 and b1680)	Cofactor and Prosthetic Group Biosynthesis	Cofactor and Prosthetic Group Biosynthesis
								PSL	I2FE2SS	S2FE2SS2	(b3807 and b2530 and b2529)	(b3807 and b1683 and b1682 and b1681 and b1679 and b1680)	Cofactor and Prosthetic Group Biosynthesis	Cofactor and Prosthetic Group Biosynthesis
								PSL	I2FE2SS	S2FE2ST	(b3807 and b2530 and b2529)	(b1684 and b1683 and b1682 and b1681)	Cofactor and Prosthetic Group Biosynthesis	Cofactor and Prosthetic Group Biosynthesis
								PSL	I2FE2SS	S4FE4SR	(b3807 and b2530 and b2529)	(b1683 and b1682 and b1681)	Cofactor and Prosthetic Group Biosynthesis	Cofactor and Prosthetic Group Biosynthesis
								PSL	I2FE2SS	S4FE4ST	(b3807 and b2530 and b2529)	(b1684 and b1683 and b1682 and b1681)	Cofactor and Prosthetic Group Biosynthesis	Cofactor and Prosthetic Group Biosynthesis
								PSL	I2FE2SS	SCYSDS	(b3807 and b2530 and b2529)	(b1679 and b1680)	Cofactor and Prosthetic Group Biosynthesis	Cofactor and Prosthetic Group Biosynthesis
								PSL	I2FE2SS2	S2FE2SS	(b3807 and b2530 and b2529)	(b3807 and b1683 and b1682 and b1681 and b1679 and b1680)	Cofactor and Prosthetic Group Biosynthesis	Cofactor and Prosthetic Group Biosynthesis
								PSL	I2FE2SS2	S2FE2SS2	(b3807 and b2530 and b2529)	(b3807 and b1683 and b1682 and b1681 and b1679 and b1680)	Cofactor and Prosthetic Group Biosynthesis	Cofactor and Prosthetic Group Biosynthesis
								PSL	I2FE2SS2	S4FE4SR	(b3807 and b2530 and b2529)	(b1683 and b1682 and b1681)	Cofactor and Prosthetic Group Biosynthesis	Cofactor and Prosthetic Group Biosynthesis
								PSL	I2FE2SS2	S4FE4ST	(b3807 and b2530 and b2529)	(b1684 and b1683 and b1682 and b1681)	Cofactor and Prosthetic Group Biosynthesis	Cofactor and Prosthetic Group Biosynthesis
								PSL	I2FE2SS2	SCYSDS	(b3807 and b2530 and b2529)	(b1679 and b1680)	Cofactor and Prosthetic Group Biosynthesis	Cofactor and Prosthetic Group Biosynthesis
								PSL	I2FE2ST	S2FE2SS	(b2528 and b2529)	(b3807 and b1683 and b1682 and b1681 and b1679 and b1680)	Cofactor and Prosthetic Group Biosynthesis	Cofactor and Prosthetic Group Biosynthesis
								PSL	I2FE2ST	S2FE2ST	(b2528 and b2529)	(b1684 and b1683 and b1682 and b1681)	Cofactor and Prosthetic Group Biosynthesis	Cofactor and Prosthetic Group Biosynthesis
								PSL	I2FE2ST	SCYSDS	(b2528 and b2529)	(b1679 and b1680)	Cofactor and Prosthetic Group Biosynthesis	Cofactor and Prosthetic Group Biosynthesis
								PSL	I4FE4SR	S2FE2SS	b2529	(b3807 and b1683 and b1682 and b1681 and b1679 and b1680)	Cofactor and Prosthetic Group Biosynthesis	Cofactor and Prosthetic Group Biosynthesis
								PSL	I4FE4SR	S2FE2SS2	b2529	(b3807 and b1683 and b1682 and b1681 and b1679 and b1680)	Cofactor and Prosthetic Group Biosynthesis	Cofactor and Prosthetic Group Biosynthesis
								PSL	I4FE4SR	S4FE4SR	b2529	(b1683 and b1682 and b1681)	Cofactor and Prosthetic Group Biosynthesis	Cofactor and Prosthetic Group Biosynthesis
								PSL	I4FE4SR	S4FE4ST	b2529	(b1684 and b1683 and b1682 and b1681)	Cofactor and Prosthetic Group Biosynthesis	Cofactor and Prosthetic Group Biosynthesis
								PSL	I4FE4SR	SCYSDS	b2529	(b1679 and b1680)	Cofactor and Prosthetic Group Biosynthesis	Cofactor and Prosthetic Group Biosynthesis
								PSL	I4FE4ST	S2FE2SS	(b2528 and b2529)	(b3807 and b1683 and b1682 and b1681 and b1679 and b1680)	Cofactor and Prosthetic Group Biosynthesis	Cofactor and Prosthetic Group Biosynthesis
								PSL	I4FE4ST	S2FE2SS2	(b2528 and b2529)	(b3807 and b1683 and b1682 and b1681 and b1679 and b1680)	Cofactor and Prosthetic Group Biosynthesis	Cofactor and Prosthetic Group Biosynthesis
								PSL	I4FE4ST	S4FE4SR	(b2528 and b2529)	(b1683 and b1682 and b1681)	Cofactor and Prosthetic Group Biosynthesis	Cofactor and Prosthetic Group Biosynthesis
								PSL	I4FE4ST	S4FE4ST	(b2528 and b2529)	(b1684 and b1683 and b1682 and b1681)	Cofactor and Prosthetic Group Biosynthesis	Cofactor and Prosthetic Group Biosynthesis
								PSL	I4FE4ST	SCYSDS	(b2528 and b2529)	(b1679 and b1680)	Cofactor and Prosthetic Group Biosynthesis	Cofactor and Prosthetic Group Biosynthesis
								PSL	IPDPS	IPDDI	b0029	b2889	Cofactor and Prosthetic Group Biosynthesis	Cofactor and Prosthetic Group Biosynthesis
								PSL	Kt2pp	Kabcpp	((b1291 and b3290 and b3849) or b1250 or (b1291 and b3290 and b1363) or b3747)	((b0698 and b0697 and b0696) or (b0698 and b0697 and b0696 and b4513))	Inorganic Ion Transport and Metabolism	Inorganic Ion Transport and Metabolism
								PSL	MN2tpp	MNt2pp	b3040	b2392	Inorganic Ion Transport and Metabolism	Transport, Inner Membrane
								PSL	RNTR2c2	NDPK5	((b0684 and b3924 and b4238 and b4237) or (b2895 and b3924 and b4238 and b4237) or (b0684 and b4238) or (b2895 and b4238))	(b0474 or b2518)	Nucleotide Salvage Pathway	Nucleotide Salvage Pathway
								PSL	RNTR3c2	NDPK7	((b0684 and b3924 and b4238 and b4237) or (b2895 and b3924 and b4238 and b4237) or (b0684 and b4238) or (b2895 and b4238))	(b0474 or b2518)	Nucleotide Salvage Pathway	Nucleotide Salvage Pathway
								PSL	RNTR1c2	NDPK8	((b0684 and b3924 and b4238 and b4237) or (b2895 and b3924 and b4238 and b4237) or (b0684 and b4238) or (b2895 and b4238))	(b0474 or b2518)	Nucleotide Salvage Pathway	Nucleotide Salvage Pathway
								PSL	NI2tpp	NI2uabcpp	b3816	((b3476 and b3477 and b3478 and b3479 and b3480) or b4242)	Inorganic Ion Transport and Metabolism	Inorganic Ion Transport and Metabolism
								PSL	PIt2rpp	PIuabcpp	(b2987 or b3493)	(b3726 and b3725 and b3727 and b3728)	Inorganic Ion Transport and Metabolism	Inorganic Ion Transport and Metabolism
								PSL	PPKr	PPA	b2501	(b2744 or b4226 or b2502)	Oxidative Phosphorylation	Anaplerotic Reactions
								PSL	ZN2tpp	ZNabcpp	b3040	(b1857 and b1859 and b1858)	Inorganic Ion Transport and Metabolism	Inorganic Ion Transport and Metabolism
